# Supplementary material for: Association between periodontitis and peripheral artery disease: a systematic review and meta-analysis
Source: Springer Nature journal article supplement (doi:10.1186/s12872-018-0879-0), 2018-07-06
Supplement: MOESM2 [file 15913904]

**Table 1** The key words and database.

| Database         | Key words                                                                                               |
|------------------|---------------------------------------------------------------------------------------------------------|
| Pubmed           | (periodontitis OR periodontal disease) AND (peripheral vascular disease OR peripheral arterial disease) |
| Embase           | (periodontitis OR periodontal disease) AND (peripheral vascular disease OR peripheral arterial disease) |
| Cochrane Library | (periodontitis OR periodontal disease) AND (peripheral vascular disease OR peripheral arterial disease) |
